# Supplementary material for: Media bias exposure and the incidence of COVID-19 in the USA
Source: PubMed Central journal article supplement — BMJ Glob Health. 2021 Sep 12;6(9):e006798. doi: 10.1136/bmjgh-2021-006798 (PMC8438570; doi:10.1136/bmjgh-2021-006798), 2021-09-12
Supplement: bmjgh-2021-006798supp001.pdf [file bmjgh-2021-006798supp001.pdf]

**MEDIA BIAS EXPOSURE AND THE INCIDENCE OF COVID-19 IN THE U.S.****Appendix I: Media Outlets and Audience Shares**

| <b>Platform</b> | <b>Variable</b>                               | <b>Audience<br/>(% of<br/>sample)</b> |
|-----------------|-----------------------------------------------|---------------------------------------|
| TV              | The Late Show with Stephen Colbert (CBS)      | 13.05%                                |
| TV              | Hannity (Fox)                                 | 11.21%                                |
| TV              | Tucker Carlson Tonight (Fox)                  | 11.60%                                |
| TV              | The Rachel Maddow Show (MSNBC)                | 11.31%                                |
| TV              | The Last Word with Lawrence O'Donnell (MSNBC) | 10.90%                                |
| TV              | The Five (Fox)                                | 10.63%                                |
| TV              | The Ingraham Angle (Fox)                      | 10.62%                                |
| TV              | The Story with Martha MacCallum (Fox)         | 10.55%                                |
| TV              | The Lead with Jake Tapper (CNN)               | 9.79%                                 |
| TV              | Anderson Cooper 360 (CNN)                     | 10.40%                                |
| TV              | Special Report with Bret Baier (Fox)          | 10.58%                                |
| TV              | CBS Evening News with Martha O'Donnell        | 9.96%                                 |
| TV              | ABC World News Tonight                        | 9.73%                                 |
| TV              | NBC Nightly News with Lester Holt             | 10.50%                                |
| TV              | Cuomo Prime Time (CNN)                        | 10.13%                                |
| TV              | Erin Burnett Outfront (CNN)                   | 9.36%                                 |
| TV              | Face the Nation (CBS)                         | 9.39%                                 |
| TV              | Meet the Press (NBC)                          | 9.15%                                 |
| TV              | CBS This Morning                              | 9.00%                                 |
| TV              | Good Morning America (ABC)                    | 8.91%                                 |
| TV              | Today (NBC)                                   | 8.43%                                 |
| TV              | Fox and Friends                               | 9.12%                                 |
| TV              | Morning Joe (MSNBC)                           | 8.81%                                 |
| TV              | All In with Chris Hayes (MSNBC)               | 9.23%                                 |
| TV              | 11th Hour with Brian Williams (MSNBC)         | 9.11%                                 |
| TV              | PBS News Hour                                 | 9.36%                                 |
| Radio           | Rush Limbaugh                                 | 5.37%                                 |
| Radio           | The Sean Hannity Show                         | 4.20%                                 |
| Radio           | Marketplace (NPR)                             | 5.40%                                 |
| Radio           | All Things Considered (NPR)                   | 9.23%                                 |
| Radio           | The Dave Ramsey Show                          | 2.97%                                 |

|                  |                           |        |
|------------------|---------------------------|--------|
| Radio            | Morning Edition (NPR)     | 7.71%  |
| Radio            | The Mark Levin Show       | 2.74%  |
| Radio            | The Glenn Beck Program    | 2.44%  |
| Radio            | The Mike Gallagher Show   | 0.46%  |
| Radio            | The Hugh Hewitt Show      | 0.31%  |
| Radio            | The Savage Nation         | 1.11%  |
| Radio            | The Dana Show             | 0.49%  |
| Radio            | The Thom Hartmann Program | 0.23%  |
| Radio            | The Jim Bohannon Show     | 0.13%  |
| Radio            | Fresh Air (NPR)           | 6.81%  |
| Web              | Yahoo News                | 11.70% |
| Web              | CNN.com                   | 18.04% |
| Web              | Huffington Post           | 9.18%  |
| Web              | The New York Times        | 16.27% |
| Web              | Breitbart News Network    | 2.24%  |
| Web              | Fox News                  | 13.10% |
| Web              | The Washington Post       | 13.70% |
| Web              | The Guardian              | 6.10%  |
| Web              | USA Today                 | 9.20%  |
| Web              | BBC News                  | 9.74%  |
| Web              | NPR News                  | 10.23% |
| Web              | Daily Caller              | 0.84%  |
| Web              | Bloomberg                 | 5.07%  |
| Web              | Buzzfeed                  | 8.07%  |
| Web              | NBC News                  | 8.58%  |
| Print            | The New York Times        | 4.62%  |
| Print            | USA Today                 | 3.29%  |
| Print            | The Wall Street Journal   | 2.91%  |
| Print            | The Washington Post       | 3.26%  |
| Online Newspaper | The New York Times        | 10.45% |
| Online Newspaper | USA Today                 | 4.53%  |
| Online Newspaper | The Wall Street Journal   | 4.38%  |
| Online Newspaper | The Washington Post       | 8.15%  |
